# Supplementary material for: Phenol-substituted nitronyl nitroxide biradicals with a triplet (S = 1) ground state
Source: Royal Society of Chemistry journal article supplement (doi:10.1039/b007316o), 2001-01-01
Supplement: b007316o2.doc [file b007316o2.doc]

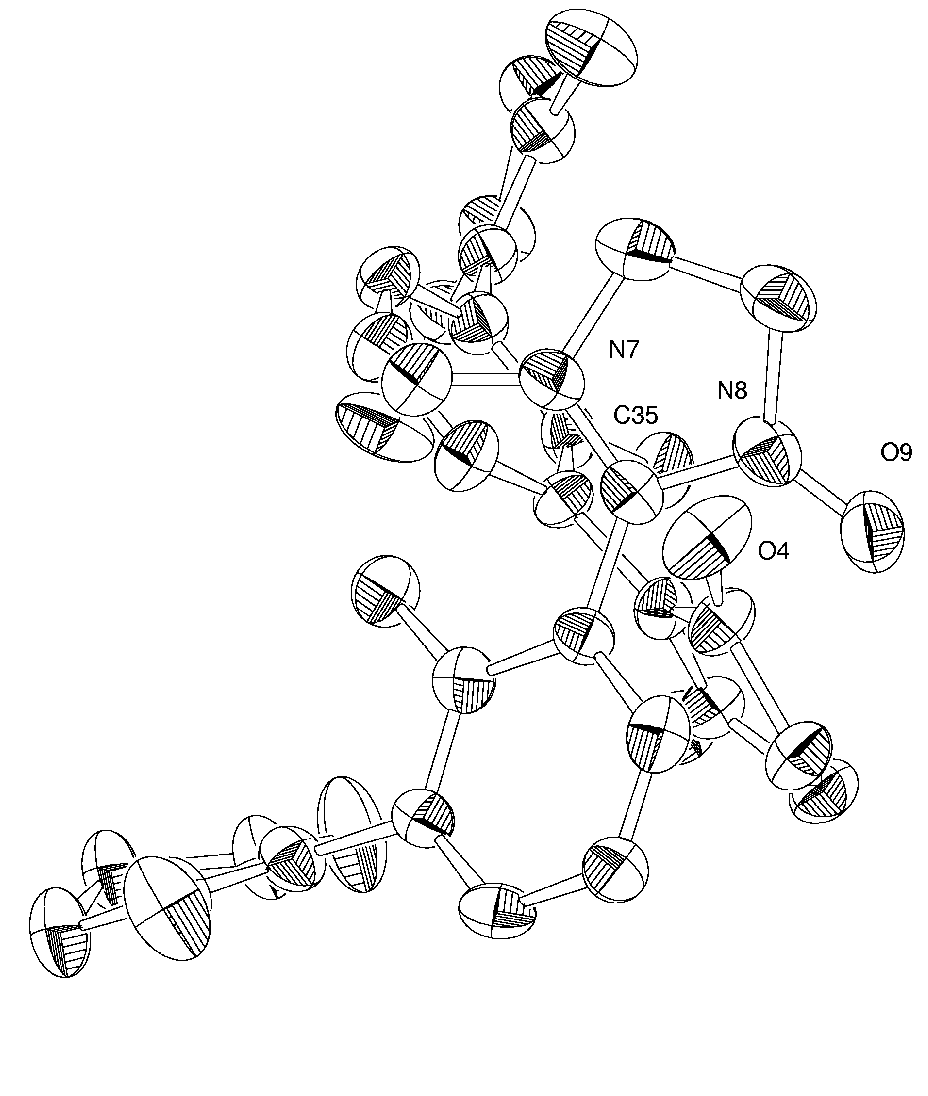


(a)


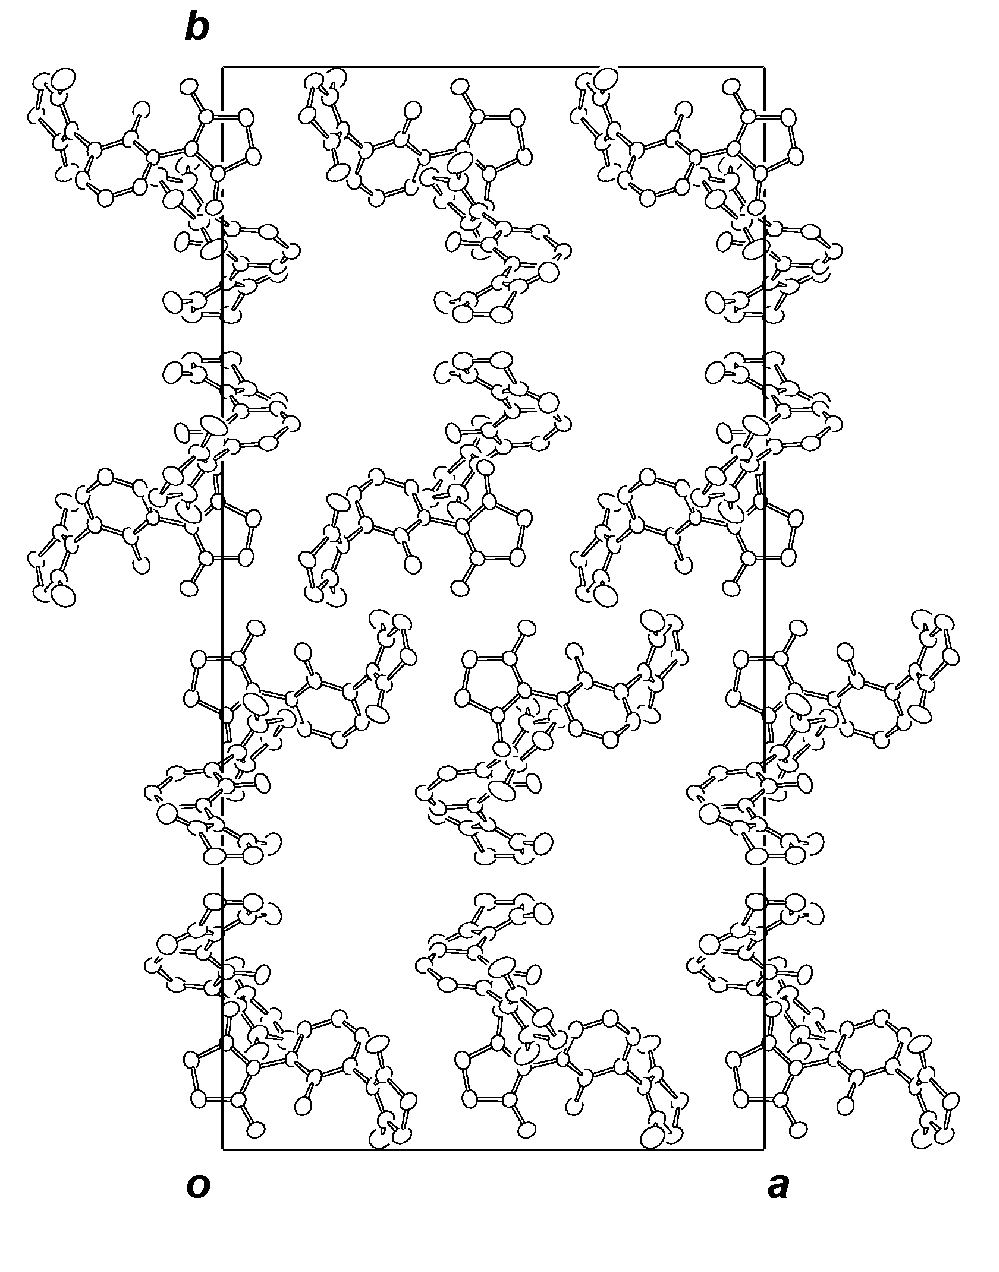


(b)

**Fig. S2**  Crystalstructure of **2a**: (a) The neighboring two molecules, A and B, with the short intermolecular atom-atom distances; 3.12 Å (O4-C35) and 3.19 Å (O4-N8). (b) The molecular packing viewed along the *c*-axis. The methyl groups in the nitronyl nitroxide molecules and the crystal solvent of acetone are omitted for clarity.
